# Supplementary material for: The Programmable Catalytic Core of 8-17 DNAzymes
Source: MDPI journal article supplement (doi:10.3390/molecules29112420), 2024-05-21
Supplement: s1 [file s1]

## Electronic supplementary materials

### The Programmable Catalytic Core of 8-17 DNAzymes

Fumei Zhang, Weiguo Shi, Lei Guo, Shihui Liu, Junlin He

#### Content

|                                                                                                                          |    |
|--------------------------------------------------------------------------------------------------------------------------|----|
| Figure S1 The catalytic reactions of 8-17 DNAzymes in the cell-mimicking buffer                                          | S2 |
| Figure S2 DNAzymes with extra W12.0 evaluated under single-turnover conditions in the presence of 10 $\mu$ M metal ions. | S2 |
| Figure S3 The catalytic reactions of DNAzymes with extra W12.0 in the presence of higher concentrations of metal ions.   | S3 |

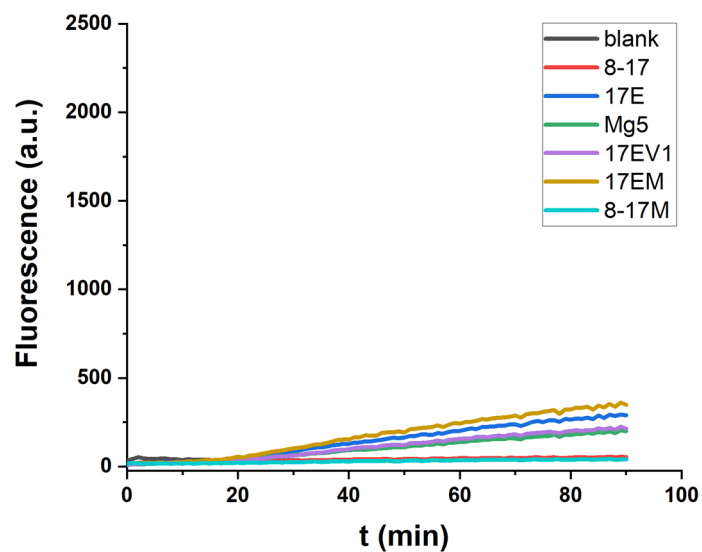

**Figure S1** The catalytic reactions of 8-17 DNAzymes in the cell-mimicking buffer. The buffer containing 100 mM NaCl, 50 mM KCl, and 1 mM  $\text{MgCl}_2$  in 50 mM Tris-HCl (pH 7.40) was used, under the single-turnover conditions ( $0.5 \mu\text{M}$  DNAzyme versus  $0.05 \mu\text{M}$  substrate).

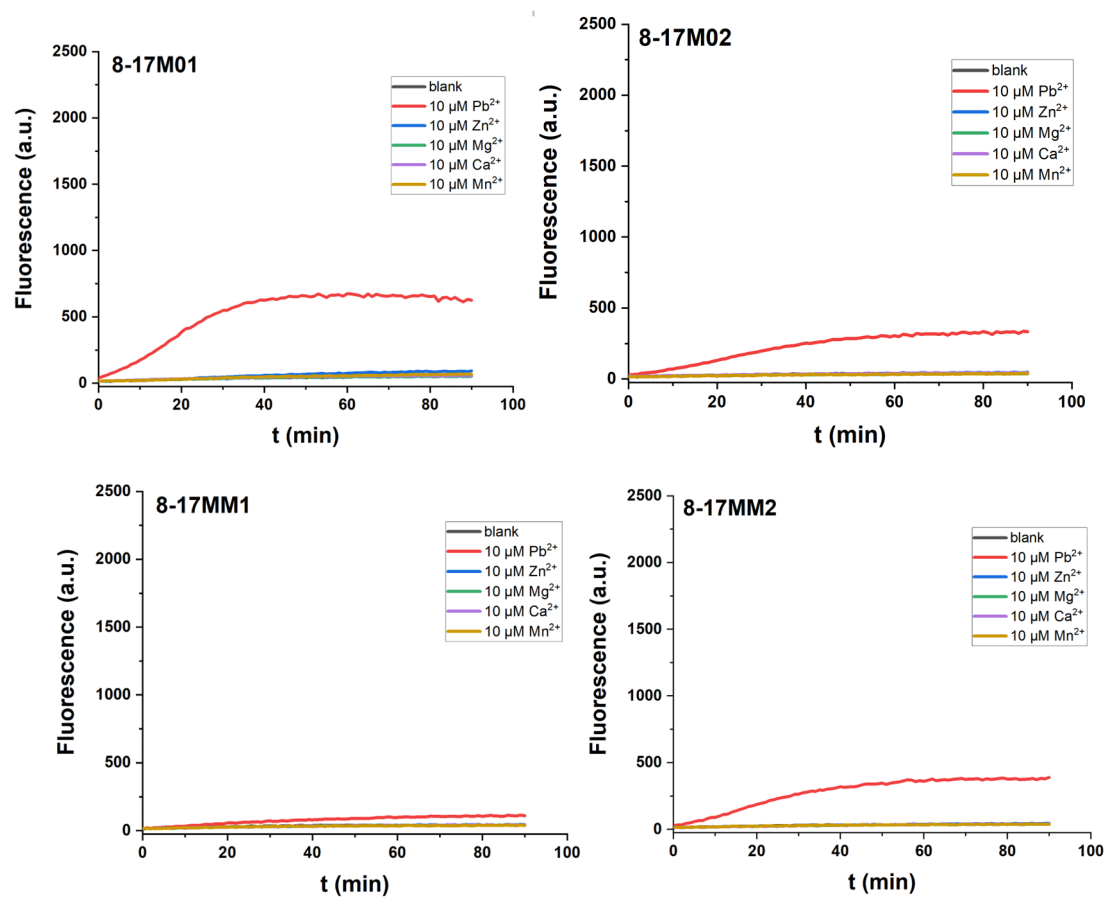

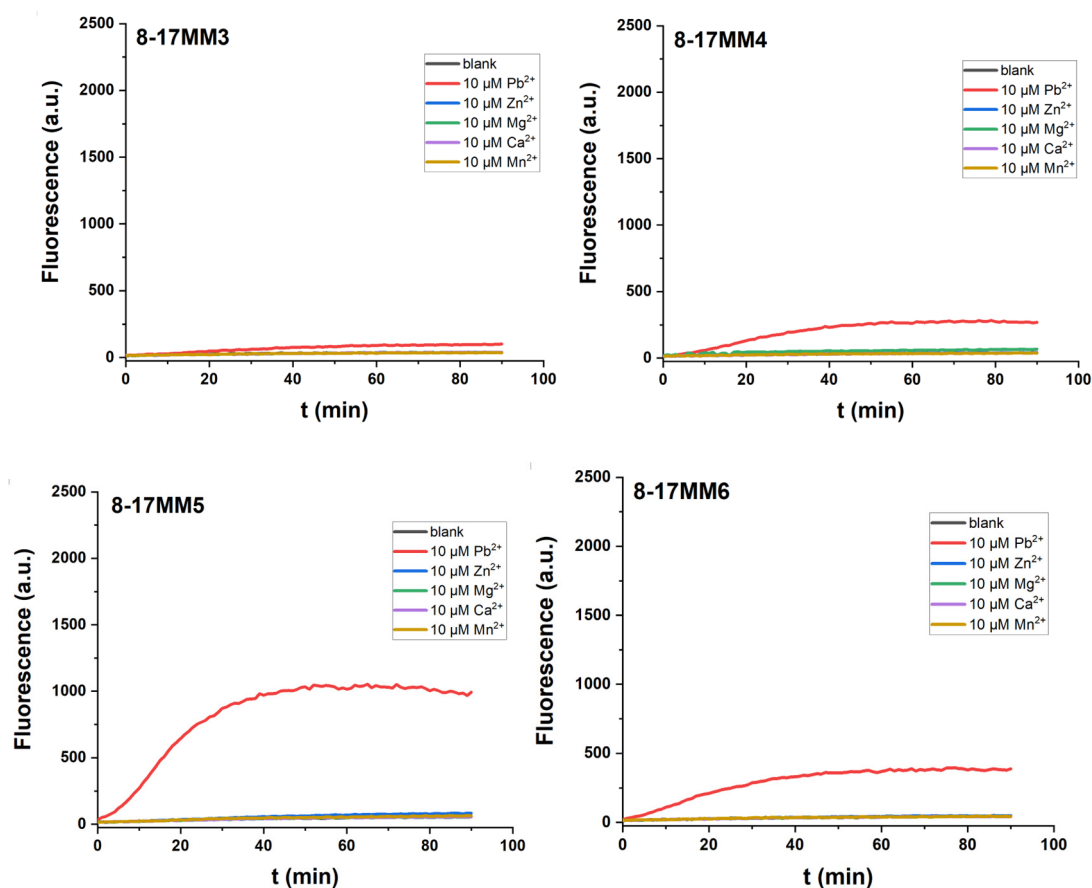

**Figure S2** DNAzymes with extra  $W^{12.0}$  evaluated under single-turnover conditions in the presence of 10  $\mu\text{M}$  metal ions. The reaction between 0.5  $\mu\text{M}$  DNAzyme and 0.05  $\mu\text{M}$  substrate was conducted in the buffer (50 mM HEPES, pH 7.27), in the presence of 10  $\mu\text{M}$   $\text{Ca}^{2+}$ ,  $\text{Mg}^{2+}$ ,  $\text{Zn}^{2+}$ ,  $\text{Pb}^{2+}$ ,  $\text{Mn}^{2+}$ , respectively.

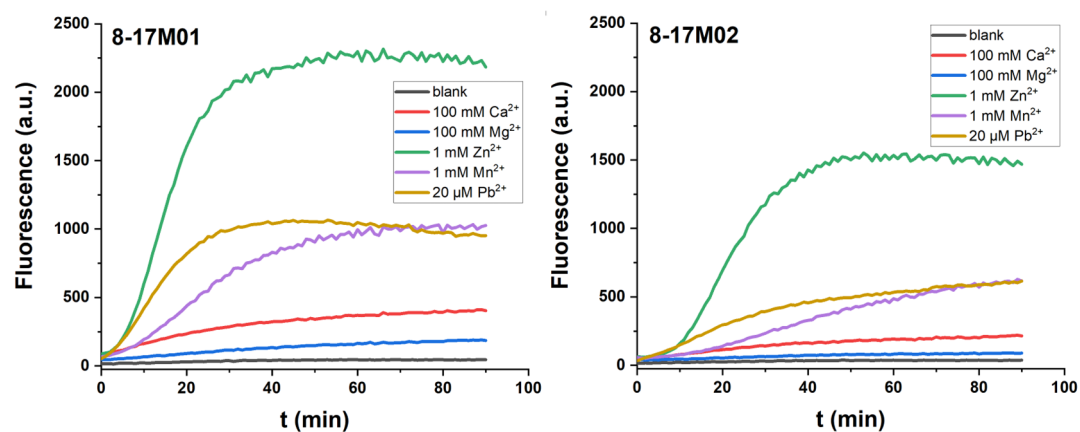

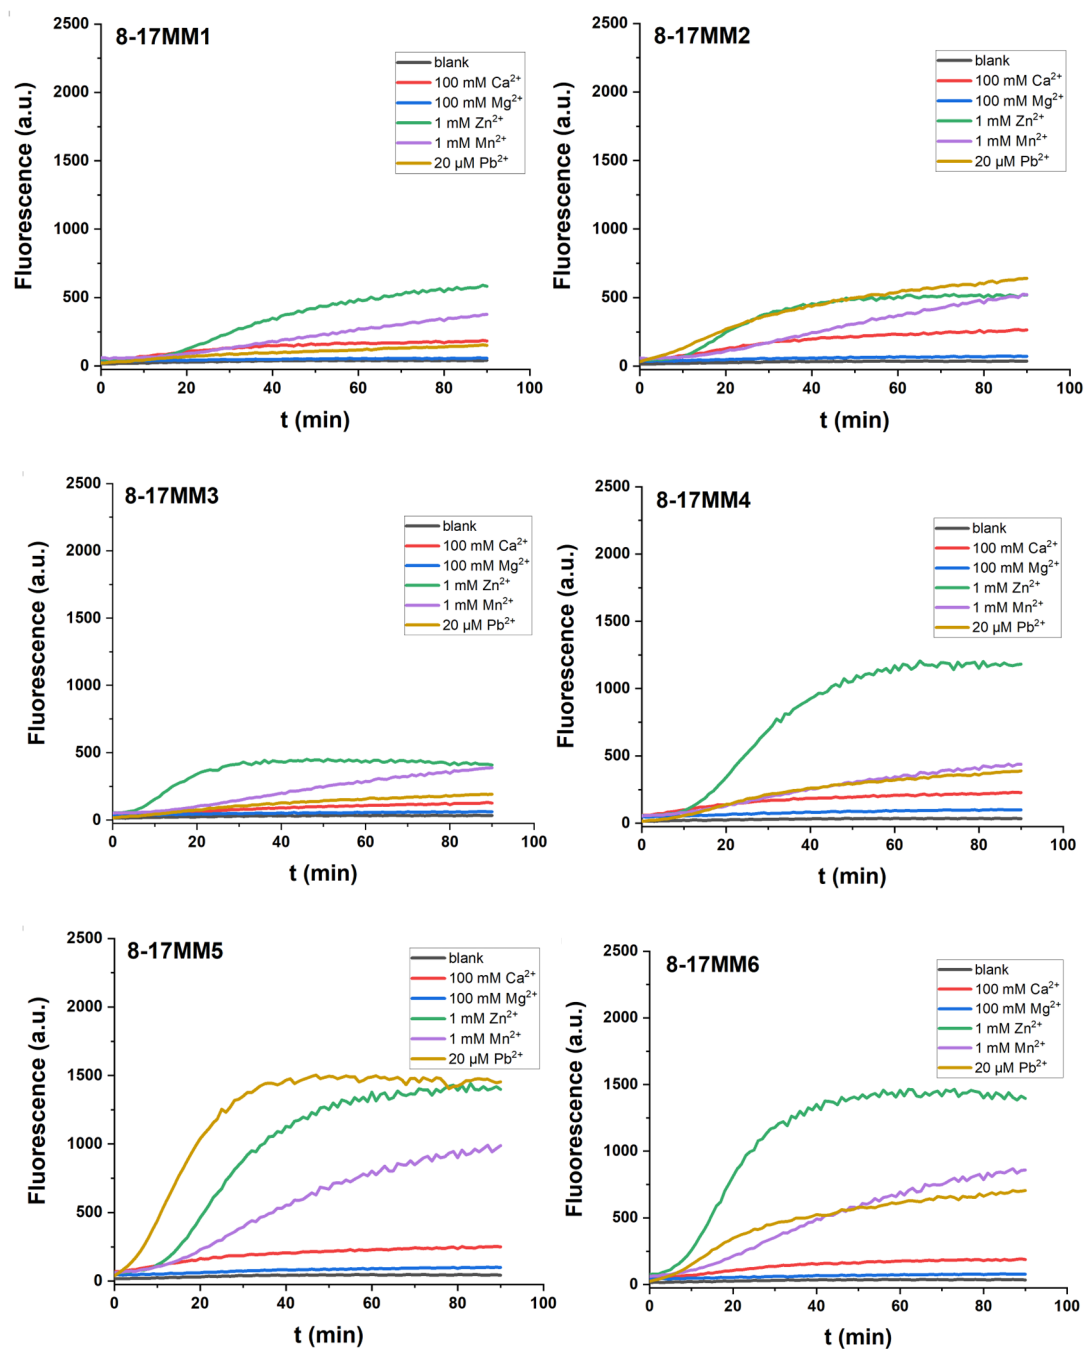

**Figure S3** The catalytic reactions of DNAzymes with extra  $W^{12.0}$  in the presence of higher concentrations of metal ions. Single-turnover conditions were used: 0.5  $\mu M$  DNAzyme and 0.05  $\mu M$  substrate in the buffer (50 mM HEPES, pH 7.27) containing 100 mM  $Na^+$ , in the presence of  $Ca^{2+}$  (1 mM),  $Mg^{2+}$  (1 mM),  $Mn^{2+}$  (1 mM),  $Zn^{2+}$  (250  $\mu M$ ),  $Pb^{2+}$  (20  $\mu M$ ), respectively.
